# Supplementary material
Source: Springer Nature journal article supplement (https://www.springermedizin.de/resource/supplementary/12906_2006_104_MOESM3_ESM.pdf/9524028)

**A**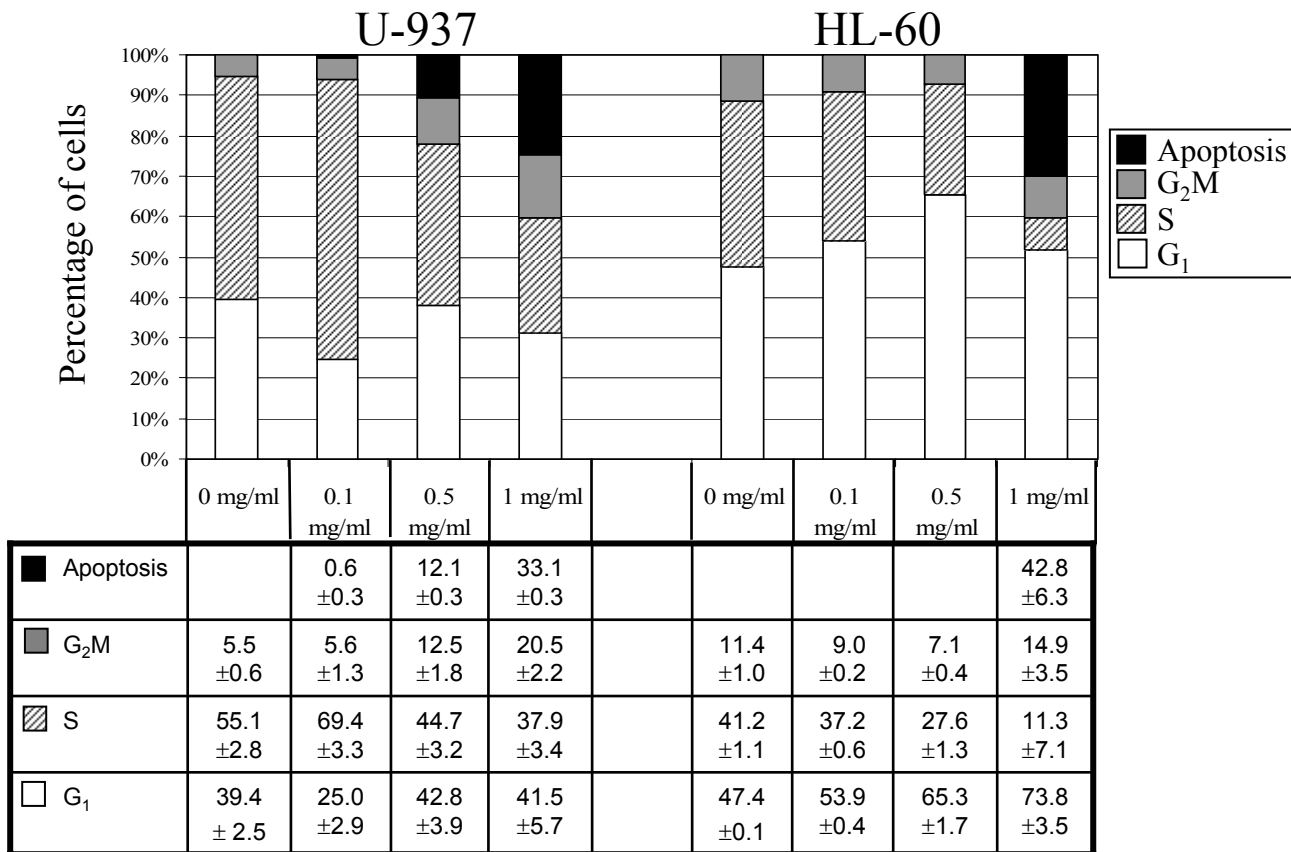**B**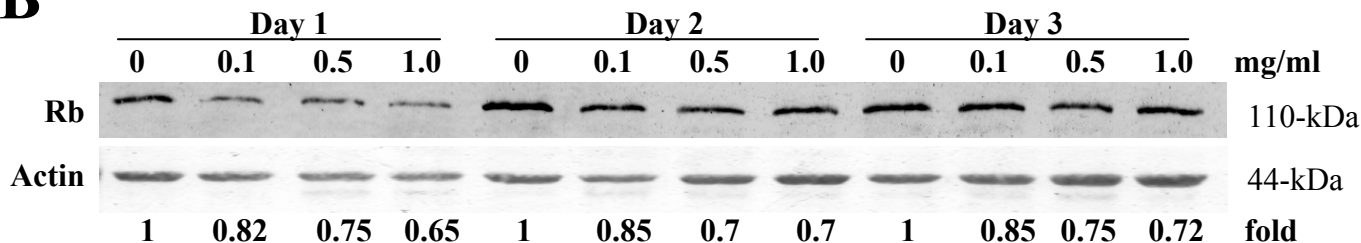

Supplement: MOESM3 [file 9524028]
